# Supplementary material
Source: PubMed Central journal article supplement (PMC6239910)
Supplement: NIHMS1507957-supplement-1.pdf [file NIHMS1507957-supplement-1.pdf]

## **Supplemental Information**

### **A bifunctional role for the UHRF1 UBL domain in the control of hemimethylated DNA-dependent histone ubiquitylation**

Paul A. DaRosa, Joseph S. Harrison, Alex Zelter, Trisha N. Davis, Peter Brzovic, Brian Kuhlman, Rachel E Klevit

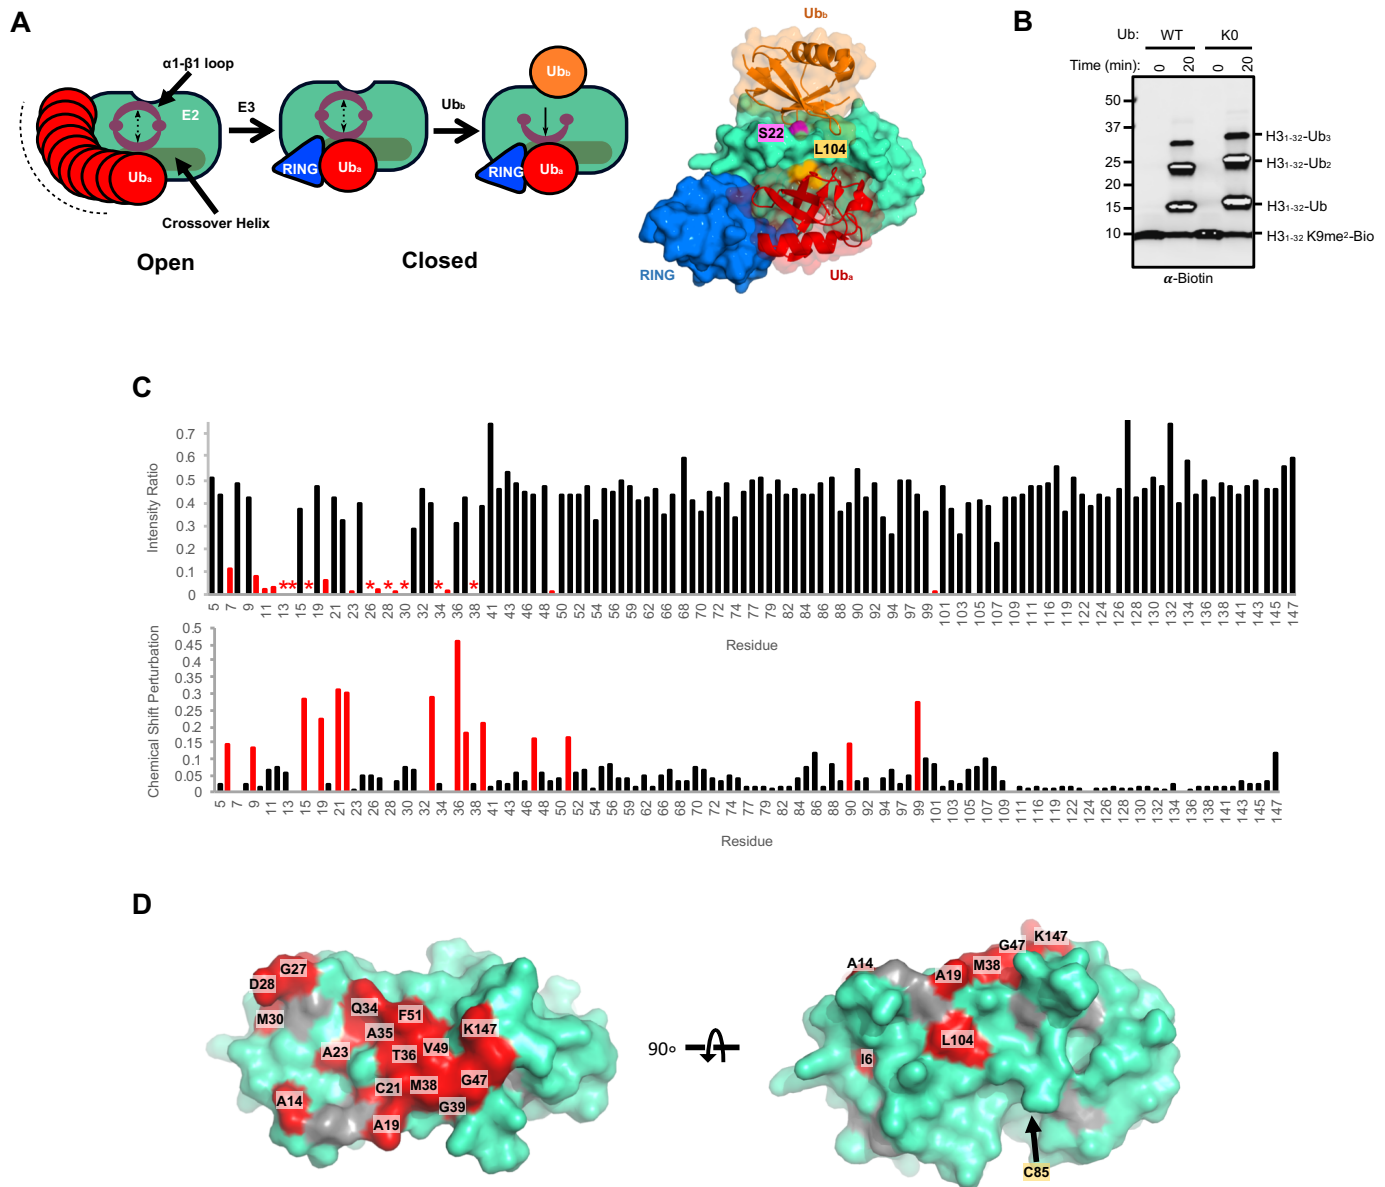

**Supplemental Figure S1 | Related to Figures 1 and 2. The UHRF1-UBL binds to the backside of Ube2D E2s**

**(A)** Cartoon of the E2-Ub activation mechanism by RING E3 ubiquitin ligases. In the absence of a RING, the conjugated ubiquitin is flexible relative to the E2 (*left*). RING domain binding promotes a “closed” conformation, where the thioester-linked ubiquitin (Ub<sub>a</sub>) interacts with a face on the E2 to facilitate aminolysis (*left center*). Binding of Ub at a noncovalent site (Ub<sub>b</sub>; *orange*) further promotes the closed conformation, purportedly by inducing the  $\alpha$ 1- $\beta$ 1 loop of Ube2D into a conformation that interacts with Ub<sub>a</sub> (*right center*). Structure of the RNF38-Ube2D2-Ub complex (PDB 3V4L) showing the locations of the noncovalent and thioester-linked

ubiquitin in the closed conformation (*right*). The location of residues at the center of the E2/Ub<sub>b</sub> and E2/Ub<sub>a</sub> interfaces are shown for orientation (S22 and L104 respectively).

**(B)** Substrate (H3-peptide, H3<sub>1-32</sub>K9me<sup>2</sup>-biotin) ubiquitylation assay with either WT ubiquitin or K0 ubiquitin (mutations: K6R, K11R, K27M, K29R, K33R, K48R, K63R) in the presence of he5mc DNA.

**(C)** <sup>1</sup>H-<sup>15</sup>N HSQC intensity ratios (bound/free intensity; *top*) and chemical shift perturbations (CSPs; *bottom*) upon addition of 450 μM UHRF1-UBL to 150 μM <sup>15</sup>N-Ube2D3. Red bars and/or red asterisks indicate residues corresponding to <sup>1</sup>H<sup>15</sup>N-HSQC peaks with CSPs and peak intensity reductions greater than the average shift/intensity loss by one standard deviation. These residues are plotted on the surface in Figure 2C.

**(D)** Surface representation of the binding site of ubiquitin (125 μM) on <sup>15</sup>N-Ube2D3 (250 μM) analyzed as in panel C and Figure 2C from previously published data (Brzovic and Klevit, 2006).



**(C)**  $^1\text{H}^{15}\text{N}$ -HSQC of 50  $\mu\text{M}$   $^{15}\text{N}$ -UHRF1-UBL in the absence (black) or presence (red) or 100  $\mu\text{M}$  Ube2I. Ube2I showed a positive interaction in the Y2H with UHRF1-UBL and the empty pGBD(120) vector, but no interaction was seen by NMR with Ube2I.

**(D)** UHRF1 substrate ( $\text{H3}_{1-32}\text{K9me}^2$ -biotin;  $\text{H3}_{1-32}$ ) ubiquitylation with the indicated E2 enzymes. Only Ube2D family members show E3-dependent ubiquitylation of  $\text{H3}_{1-32}\text{K9me}^2$ . Western blots (WB) are for the C-terminal biotin tag on  $\text{H3}_{1-32}\text{K9me}^2$ .

**A**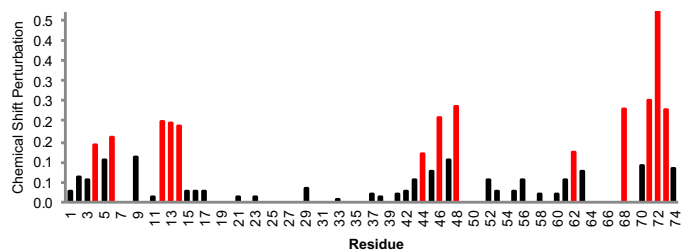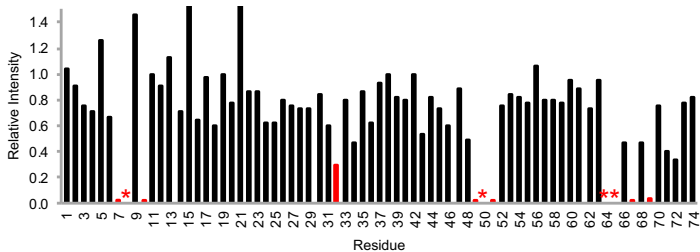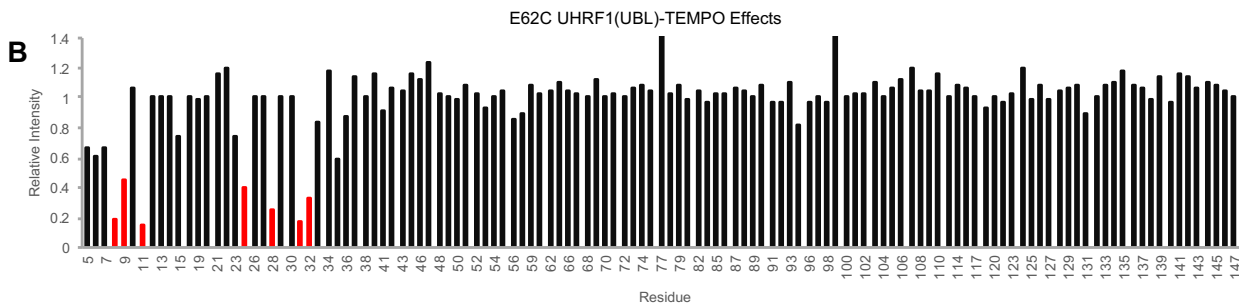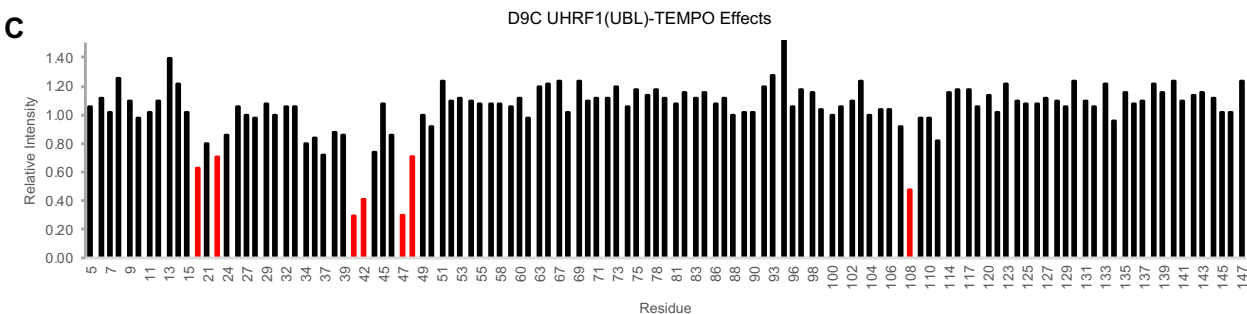**D**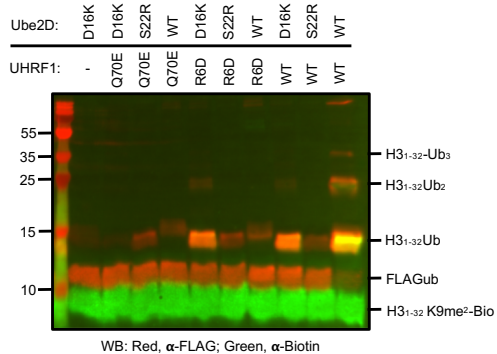**E**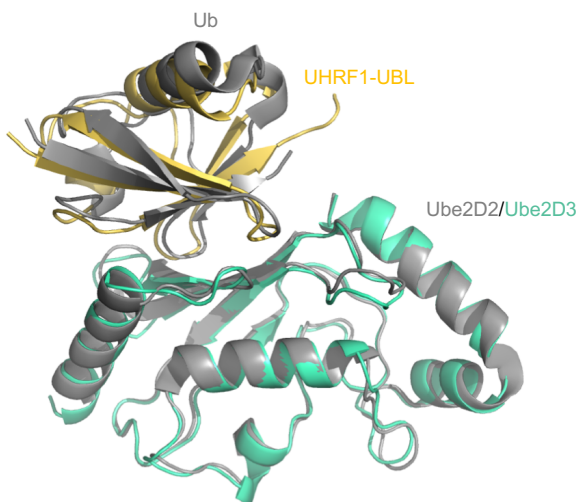

**Supplemental Figures S3 | Related to Figure 3. The UHRF1-UBL binds to the backside of Ube2D using a similar surface as Ub**

**(A)** CSPs (*left*) and intensity ratios (*right*) upon addition of 225  $\mu\text{M}$  Ube2D3 to 150  $\mu\text{M}$   $^{15}\text{N}$ -UHRF1-UBL. The binding residues colored in (A) are plotted on the surface of the UBL structure in Figure 3A (*right*).

**(B and C)** Effects of the paramagnetic spin label TEMPO conjugated at positions E62 (B) and D9 (C) of the UHRF1-UBL on  $^{15}\text{N}$ -Ube2D. Red bars indicated the top 5% of peaks that experience spin label effects in the  $^1\text{H}^{15}\text{N}$ -HSQC (highlighted on the surface of the E2 shown in Figure 3B).

**(D)** Substrate ( $\text{H3}_{1-32}\text{K9me}^2$ -biotin;  $\text{H3}_{1-32}$ ) ubiquitylation reactions between pairs of Ube2D1 and UHRF1 mutants designed to test aspects of the preliminary models of UHRF1-UBL/Ube2D. This is the same gel as shown in Figure 3C, but with additional lanes showing Q70E-UHRF1, which was omitted for simplicity.

**(E)** Structural alignment of the UHRF1-UBL/Ube2D3 model (with the UBL in gold and Ube2D3 in green) with the backside ubiquitin interaction seen in PDB 3V4L (gray) using the E2 enzymes to align the structures. While there are differences in the interactions, the relative orientation of the proteins is strikingly similar.

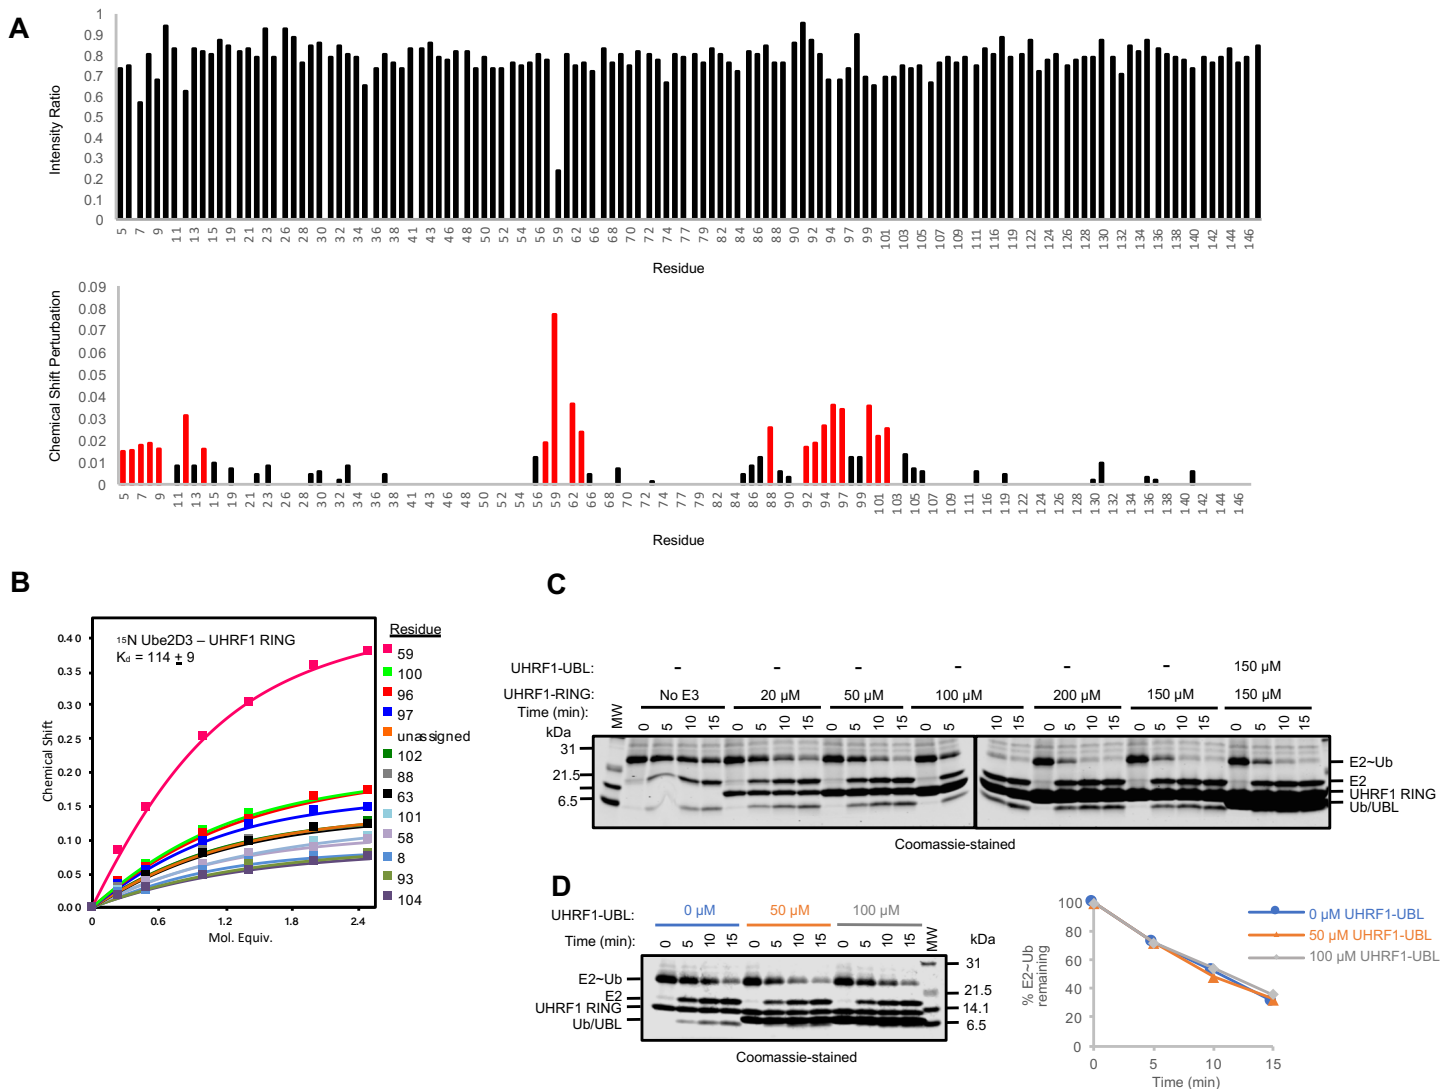

**Supplemental Figures S4 | Related to Figure 4. The UHRF1-RING binding and activity is not affected by the UHRF1-UBL**

**(A)** Peak intensity ratios (*top*) and chemical shift perturbations (CSPs; *bottom*) of Ube2D3 induced by UHRF1-RING binding: 50  $\mu\text{M}$  UHRF1-RING domain was added to 200  $\mu\text{M}$   $^{15}\text{N}$  Ube2D3(S22R/C85S). Red bars indicate residues corresponding to  $^1\text{H}^{15}\text{N}$ -HSQC peaks with CSPs greater than the average shift by one standard deviation. These residues are plotted on the Ube2D3 surface in Figure 4A.

**(B)** Binding curves generated from  $^1\text{H}^{15}\text{N}$ -HSQC peak chemical shift perturbations of 200  $\mu\text{M}$   $^{15}\text{N}$ -Ube2D3(S22R/C85S) as a function of UHRF1-RING concentration. The  $K_d$  value was determined from a 1-site, group fitting of the curves shown.



**(C)** Aminolysis of wild type Ube2D3~Ub (thioester linked) in the presence of increasing UHRF1-RING domain and 40 mM lysine and, where indicated, 150  $\mu$ M UHRF1-UBL. The presence of the UBL has no detectible enhancement of UHRF1-RING mediated aminolysis of the E2~Ub conjugate.

**(D)** Aminolysis assay as in (C) with 20  $\mu$ M UHRF1-RING and increasing UHRF1-UBL as indicated. Densitometry (*right*) shows clearly that the UHRF1-UBL does not enhance RING-mediated aminolysis of Ube2D3~Ub.



**Supplemental Figure S5 | Related to Figure 5. Mutant UHRF1 ubiquitylation and UBL binding properties**

**(A)** Full-length UHRF1 H3-peptide (H3<sub>1-32</sub>K9me<sup>2</sup>-biotin; H3<sub>1-32</sub>) time course ubiquitylation reactions with the indicated mutants. These assays show representative gels of biological duplicates used to quantify rates from densitometry shown in Figure 5B.

**(B)** ITC isotherms of binding between UBL variants and Ube2D1 (*top*) and a table of thermodynamic parameters derived from the titrations (*bottom*). Binding curves were fit to a single-site binding model. Mutant names are colored as in Figure 5A and B.

**(C)** Circular dichroism of the indicated UBL mutants at 20 μM concentration. The peak at 207 nm is indicative of a folded β-sheet-containing protein.

**(D)** The location of the UBL mutations identified in human cancers found in COSMIC are shown in spheres in the model of the UBL/E2 interaction (see **Supplemental File 2**).



(F) UHRF1 crosslinking with BS3 (lysine-lysine crosslinker) in the presence of he5mc DNA, a H3<sub>1-32</sub>K9m<sup>2</sup> peptide and, where indicated, a stable isopeptide-linked Ube2D-Ub conjugate (Ube2D3(C85K)-Ub) at the indicated time (min) (see Methods).

**A**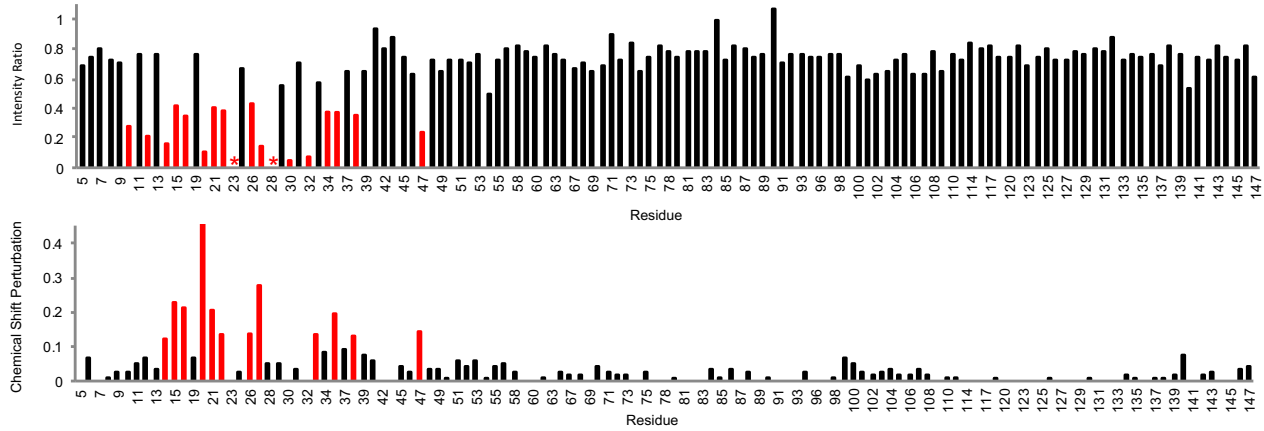**B**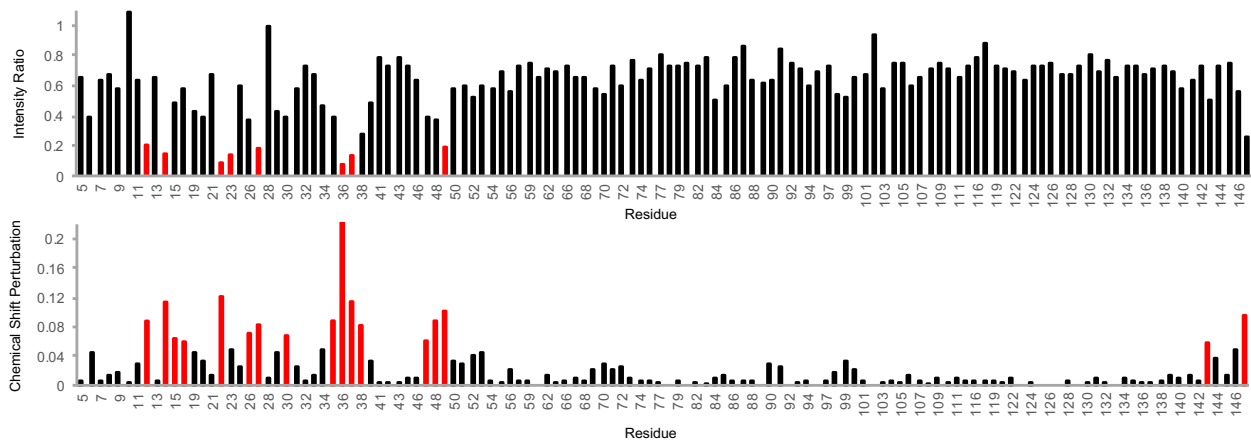**C**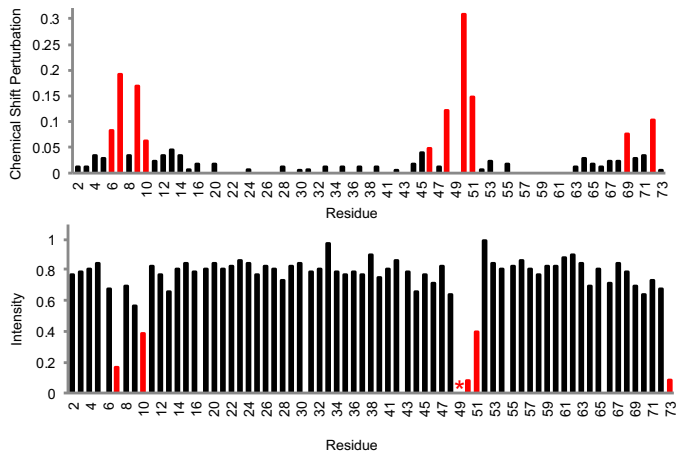**D**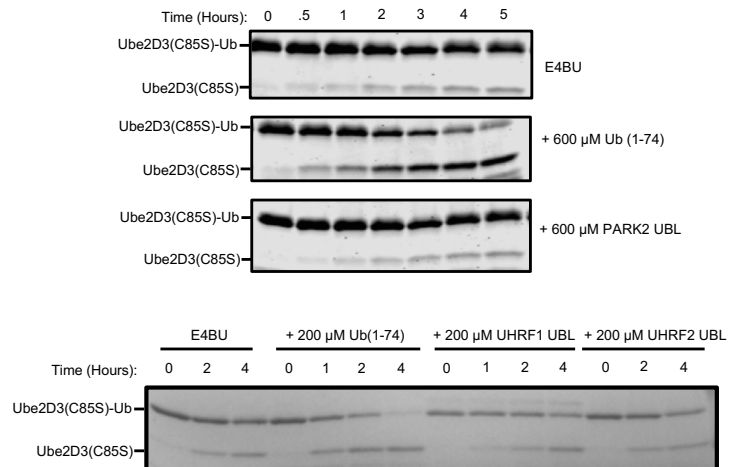

**Supplemental Figure S7 | Related to Figure 6. UHRF2 and PARKIN UBLs also bind to Ube2D.**

(A)  $^1\text{H}^{15}\text{N}$ -HSQC Ube2D3(C85S) intensity ratios (*top*) and CSPs (*bottom*) upon addition of 150  $\mu\text{M}$  UHRF2 UBL to 150  $\mu\text{M}$   $^{15}\text{N}$  Ube2D3(C85S).

(B)  $^1\text{H}^{15}\text{N}$ -HSQC Ube2D3(C85S) intensity ratios (*top*) and CSPs (*bottom*) upon addition of 150  $\mu\text{M}$  PARKIN UBL to 150  $\mu\text{M}$   $^{15}\text{N}$  Ube2D3(C85S).

(C)  $^1\text{H}^{15}\text{N}$ -HSQC UHRF2 UBL CSPs (*top*) and intensity ratios (*bottom*) upon addition of 75  $\mu\text{M}$  Ube2D3(C85S) to 150  $\mu\text{M}$   $^{15}\text{N}$ -UHRF2 UBL. Red bars and/or red asterisks indicate residues with CSPs/intensity loss greater than 1 standard deviation from the mean. These residues are plotted on the surface representations of Ube2D and UHRF2 UBL in Figure 6. Assignments for the PARKIN UBL were not obtained.

(D) E2-Ub hydrolysis assay showing hydrolysis of Ube2D3(C85S)-O-Ub (oxyester-linked) in the presence of the E4B U-box domain (E4BU; residues 1092–1173) and 600  $\mu\text{M}$  Ub(1-74) (residues 1-74 of Ub), 600  $\mu\text{M}$  Parkin UBL (*top*), or 200  $\mu\text{M}$  Ub(1-74), 200  $\mu\text{M}$  UHRF1-UBL, or 200  $\mu\text{M}$  UHRF2 UBL (*bottom*). While Ub(1-74) promotes the hydrolysis of Ube2D3(C85S)-O-Ub, no additional hydrolysis is observed for UHRF1-UBL, UHRF2 UBL, and the Parkin UBL.
